# Supplementary material for: Silencing of MUC20 suppresses the malignant character of pancreatic ductal adenocarcinoma cells through inhibition of the HGF/MET pathway
Source: PubMed Central journal article supplement (PMC6237765; doi:10.1038/s41388-018-0403-0), 2018-07-11

# Supplementary figure S2

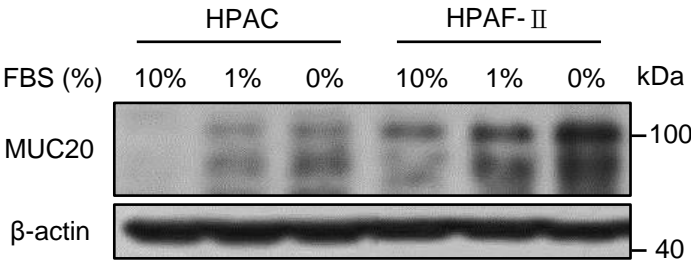

Supplement: 41388_2018_403_MOESM2_ESM.pdf [file 41388_2018_403_MOESM2_ESM.pdf]
