# Supplementary material for: Silencing of MUC20 suppresses the malignant character of pancreatic ductal adenocarcinoma cells through inhibition of the HGF/MET pathway
Source: PubMed Central journal article supplement (PMC6237765; doi:10.1038/s41388-018-0403-0), 2018-07-11
Supplement: 41388_2018_403_MOESM10_ESM.pdf [file 41388_2018_403_MOESM10_ESM.pdf]

Figure for review only

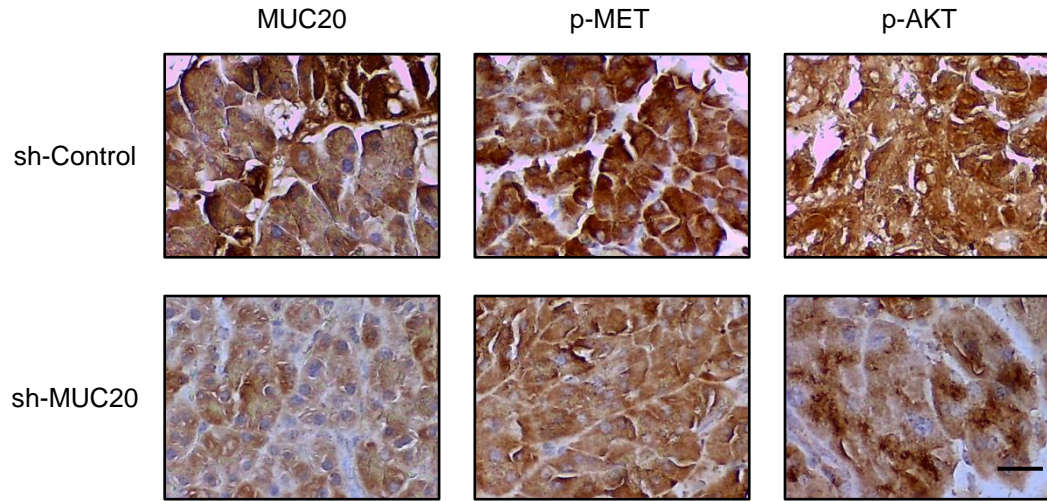

**Figure for review only.** Representative images of IHC staining of MUC20, p-MET, or p-AKT in orthotopic xenografts with control (sh-Control) or MUC20 knockdown (sh-MUC20). Scale bar indicates 20  $\mu$ m.
